# Supplementary material for: Shotgun proteomics identification of proteins expressed in the Descemet’s membrane of patients with Fuchs endothelial corneal dystrophy
Source: PubMed Central journal article supplement (PMC10300001; doi:10.1038/s41598-023-37104-1), 2023-06-27
Supplement: 41598_2023_37104_MOESM1_ESM.pdf [file 41598_2023_37104_MOESM1_ESM.pdf]

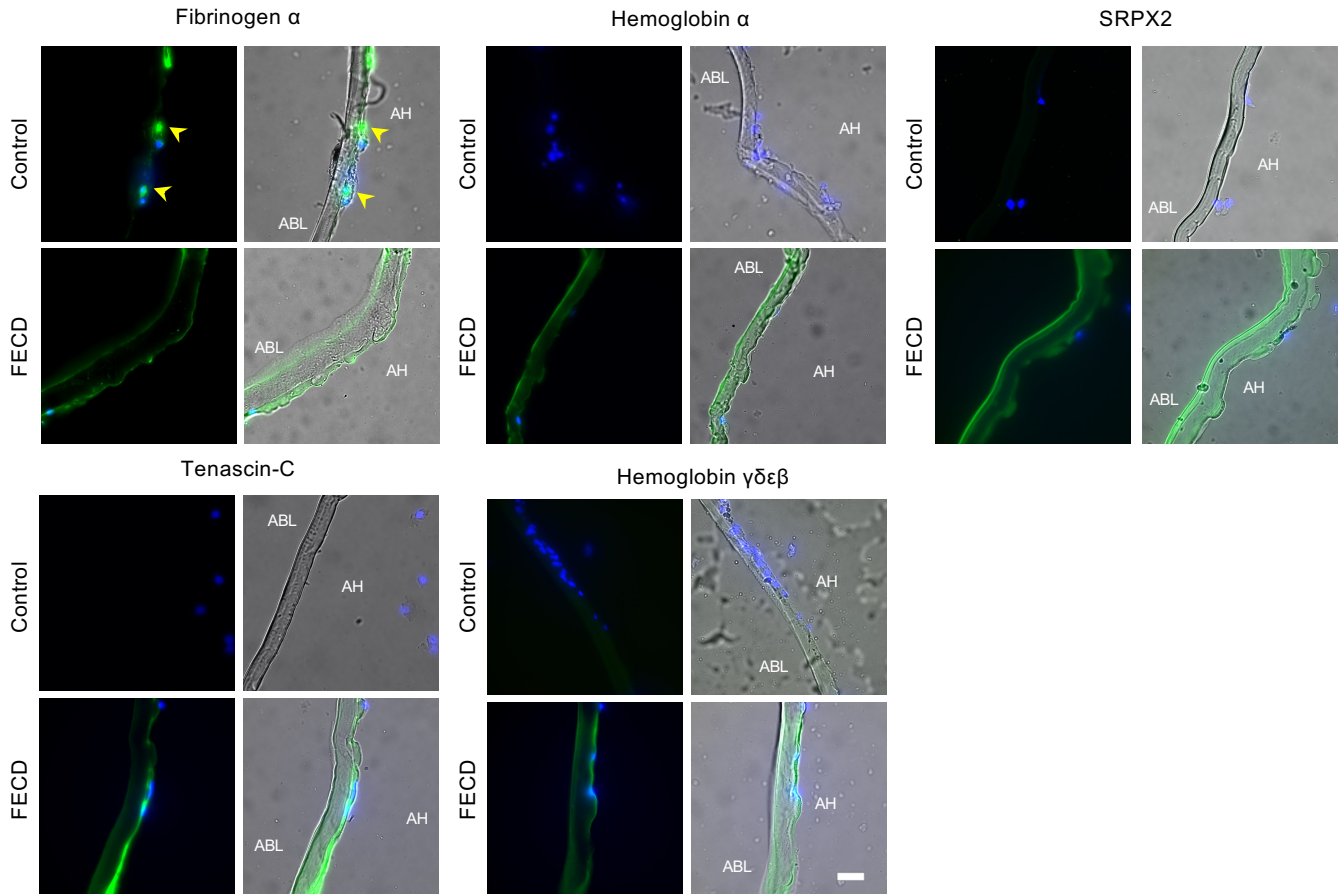

**Supplementary figure 1. Immunostaining of cross-sections of Descemet's membrane (DM) of subjects with and without FECD (Fuchs endothelial corneal dystrophy)**

The expression of the top 5 of 32 proteins expressed only in the FECD-DM but not in the non-FECD-DM was validated by immunofluorescence staining of frozen DM cross-sections. The images were observed using an epifluorescence microscope with a  $\times 60$  objective. In the non-FECD control samples, only fibrinogen  $\alpha$  showed positive staining, whereas none of the top 5 proteins (fibrinogen  $\alpha$ , hemoglobin  $\alpha$ , SRPX2, tenascin-C, and hemoglobin  $\gamma\delta\epsilon\beta$ ) were detected. Yellow arrows indicate perinuclear expression of fibrinogen  $\alpha$  in non-FECD-DM. In the FECD-DM, fibrinogen  $\alpha$ , hemoglobin  $\alpha$ , SRPX2, tenascin-C, and hemoglobin  $\gamma\delta\epsilon\beta$  were clearly detected by immunostaining. The nuclei were counterstained with DAPI. The right columns show the immunostaining image combined with bright-field imaging. AH indicates the aqueous humor (endothelial cell side) and ABL indicates an anterior banded layer (stromal side of DM). Immunostaining of each protein was repeated for 3 non-FECD-DMs and 3 FECD-DMs. The scale bar: 20  $\mu\text{m}$ .
